# Supplementary material
Source: PubMed Central journal article supplement (PMC3437051)
Supplement: Supp_Fig1.pdf [file Supp_Fig1.pdf]

## Supplementary Data

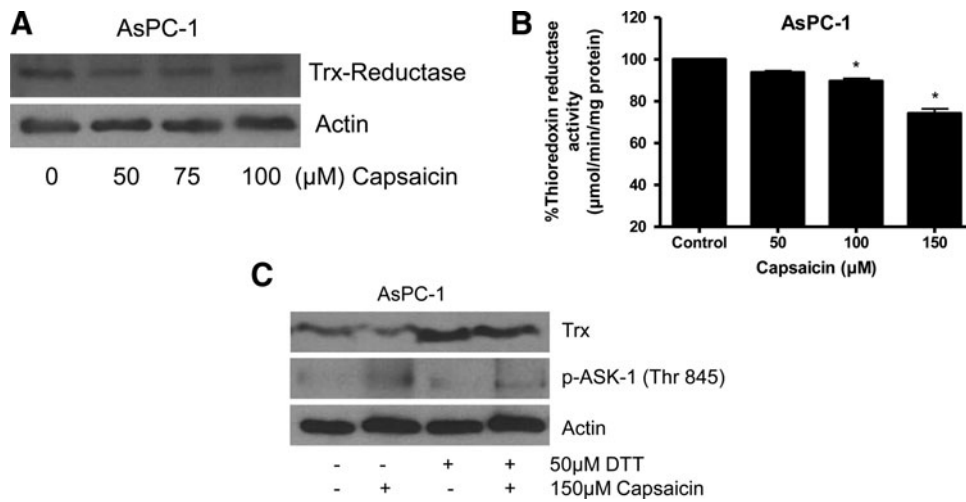

**SUPPLEMENTARY FIG. S1. Capsaicin treatment suppresses thioredoxin (Trx)-Reductase expression and activity, and reducing agent blocks capsaicin-mediated activation of apoptosis signal-regulating kinase 1 (ASK1).** (A) AsPC-1 cells were treated with various concentrations of capsaicin for 24 h. Total lysate was prepared as described in the Materials and Methods section. Capsaicin (50, 75, and 100  $\mu\text{M}$ ) treatment decreased Trx-Reductase levels as shown by a representative immunoblot. The same blots were stripped and reprobbed for actin to ensure equal protein loading. (B) AsPC-1 cells were treated with various concentration of capsaicin for 24 h, and thioredoxin reductase activity was determined using the thioredoxin reductase assay kit. \*Statistically different compared with control ( $p < 0.05$ ). (C) In another study, AsPC-1 cells were treated with 50  $\mu\text{M}$  dithiothreitol (DTT) for 1 h and then 150  $\mu\text{M}$  capsaicin for 24 h. Total cell lysates were immunoblotted with Trx and p-ASK1 (Thr845) antibodies. DTT pretreatment blocked capsaicin-mediated activation of ASK1. The same blots were stripped and reprobbed for actin to ensure equal protein loading.
